# Supplementary material for: A preliminary assessment of potential ecological risk and soil contamination by heavy metals around a cement factory, western Saudi Arabia
Source: publisher site journal article supplement (doi:10.1515/chem-2019-0059), 2019-01-01
Supplement: Supplementary file 1 [file chem-2019-0059_sm.pdf]

## Supplementary Information

Mohsen M. El-Sherbiny\*, Ali I. Ismail, Mohamed E. EL-Hefnawy

# A preliminary assessment of potential ecological risk and soil contamination by heavy metals around a cement factory, western Saudi Arabia

**Supplementary Table 1:** Geo-accumulation index ( $I_{geo}$ ) classes as classified by Müller [34].

| $I_{geo}$ value   | $I_{geo}$ class | Sediment quality                                |
|-------------------|-----------------|-------------------------------------------------|
| $I_{geo} \leq 0$  | 0               | Uncontaminated (UC)                             |
| $0 < I_{geo} < 1$ | 1               | Uncontaminated to Moderately contaminated (UMC) |
| $1 < I_{geo} < 2$ | 2               | Moderately contaminated (MC)                    |
| $2 < I_{geo} < 3$ | 3               | Moderately to heavily contaminated (MHC)        |
| $3 < I_{geo} < 4$ | 4               | Heavily contaminated (HC)                       |
| $4 < I_{geo} < 5$ | 5               | Heavily to extremely contaminated (HEC)         |
| $5 < I_{geo}$     | 6               | Extremely contaminated (EC)                     |

**Supplementary Table 2:** Classification criteria of ecological risk index ( $E_r^i$ ) and toxicity response index (RI) based on Håkanson [35].

| Potential ( $E_r^i$ )  | Toxicity (RI)       | Ecological risk level  |
|------------------------|---------------------|------------------------|
| $E_r^i < 40$           | $RI < 150$          | Low risk (LR)          |
| $40 \leq E_r^i < 80$   | $150 \leq RI < 300$ | Moderate risk (MR)     |
| $80 \leq E_r^i < 160$  | $300 \leq RI < 600$ | Considerable risk (CR) |
| $160 \leq E_r^i < 320$ | -                   | High-risk (HR)         |
| $E_r^i \leq 320$       | $600 \leq RI$       | Very high risk (VHR)   |
